# Supplementary material for: Spectrum of variations in dog-1/FANCJ and mdf-1/MAD1 defective Caenorhabditis elegans strains after long-term propagation
Source: PubMed Central journal article supplement (PMC4369104; doi:10.1186/s12864-015-1402-y), 2015-03-18

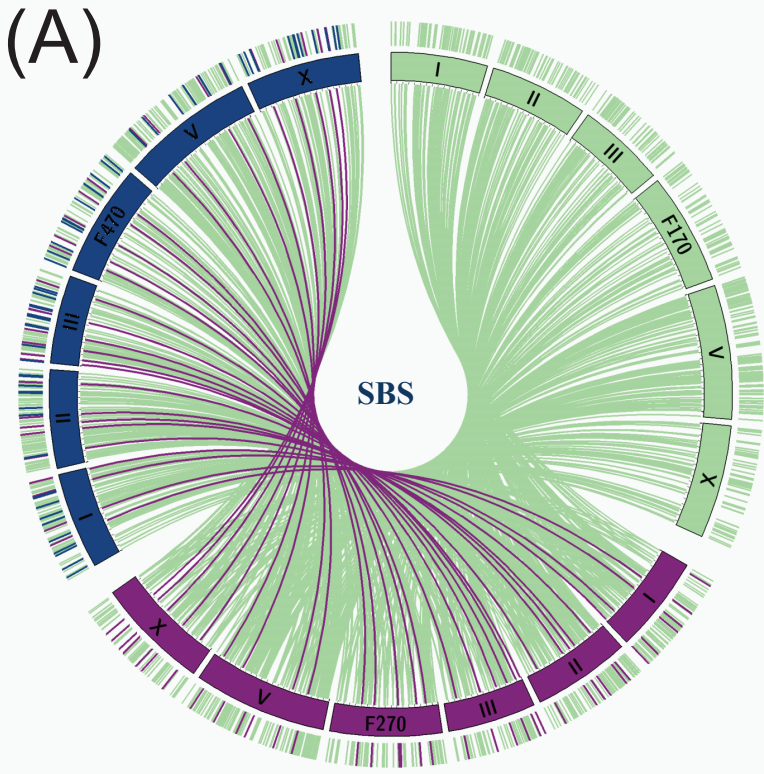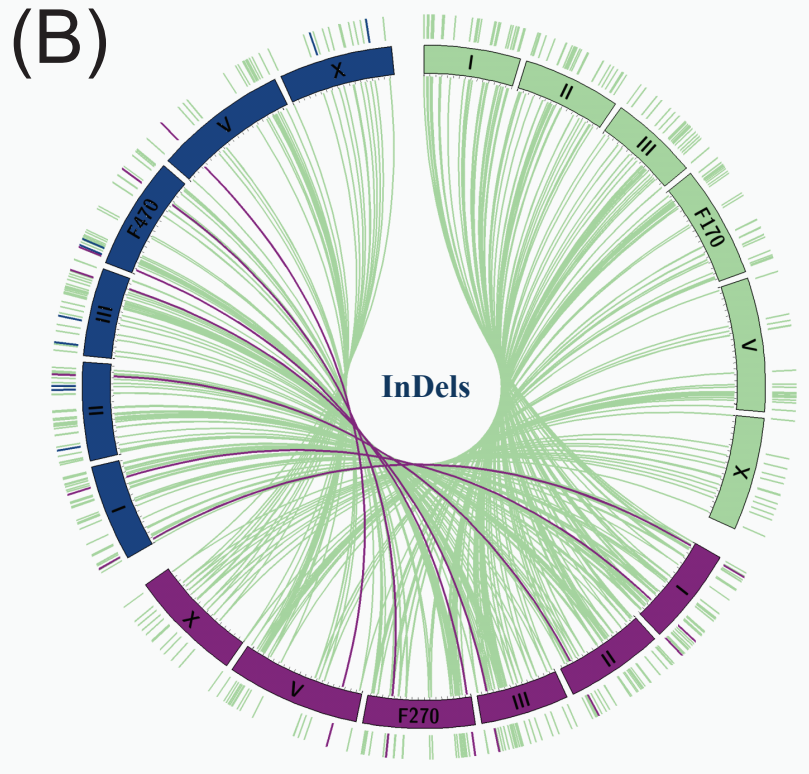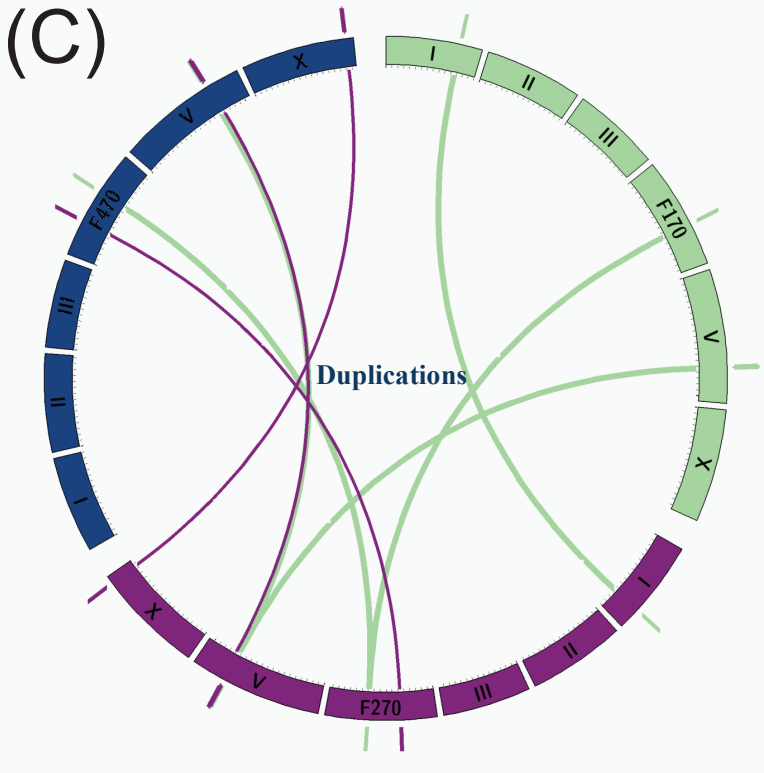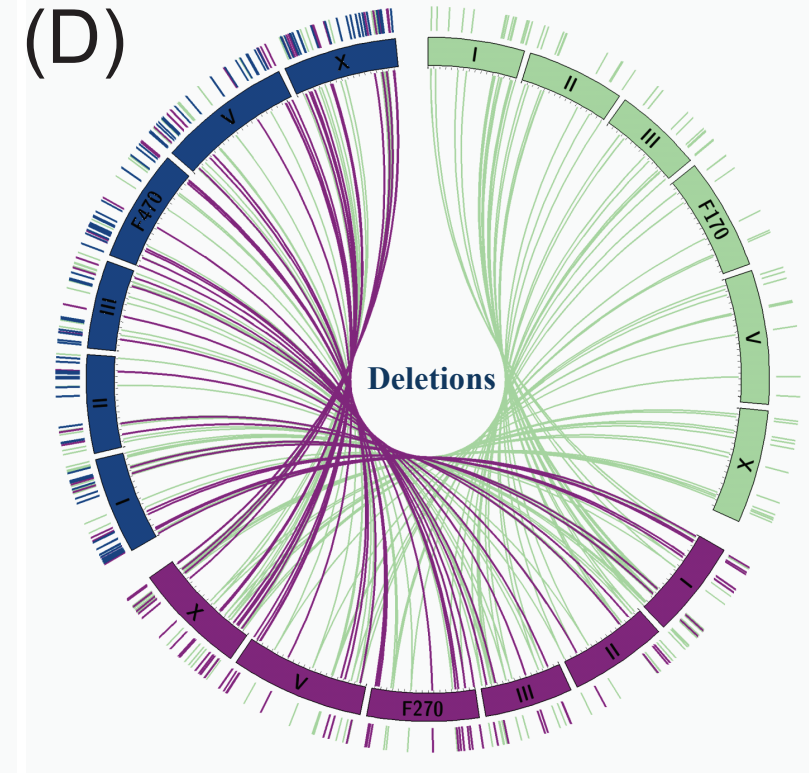

Supplement: 12864_2015_1402_MOESM1_ESM.pdf [file 12864_2015_1402_MOESM1_ESM.pdf]
